# Supplementary material for: A bioinspired heterogeneous catalyst based on the model of the manganese-dependent dioxygenase for selective oxidation using dioxygen
Source: Royal Society of Chemistry journal article supplement (doi:10.1039/c7ra00514h), 2017-01-01
Supplement: c7ra00514h1.pdf [file c7ra00514h1.pdf]

## Electronic Supporting Information

### Bioinspired heterogeneous catalyst based on the model of the manganese-dependent dioxygenase for selective oxidation using dioxygen

Jérémy Chaignon,<sup>a,b</sup> Marie Gourgues,<sup>a,c</sup> Lhoussain Khrouz,<sup>a</sup> Nicolás Moliner,<sup>b</sup> Laurent Bonneviot,<sup>a</sup> Fabienne Fache,<sup>c</sup> Isabel Castro\*<sup>b</sup> and Belén Albela\*<sup>a</sup>

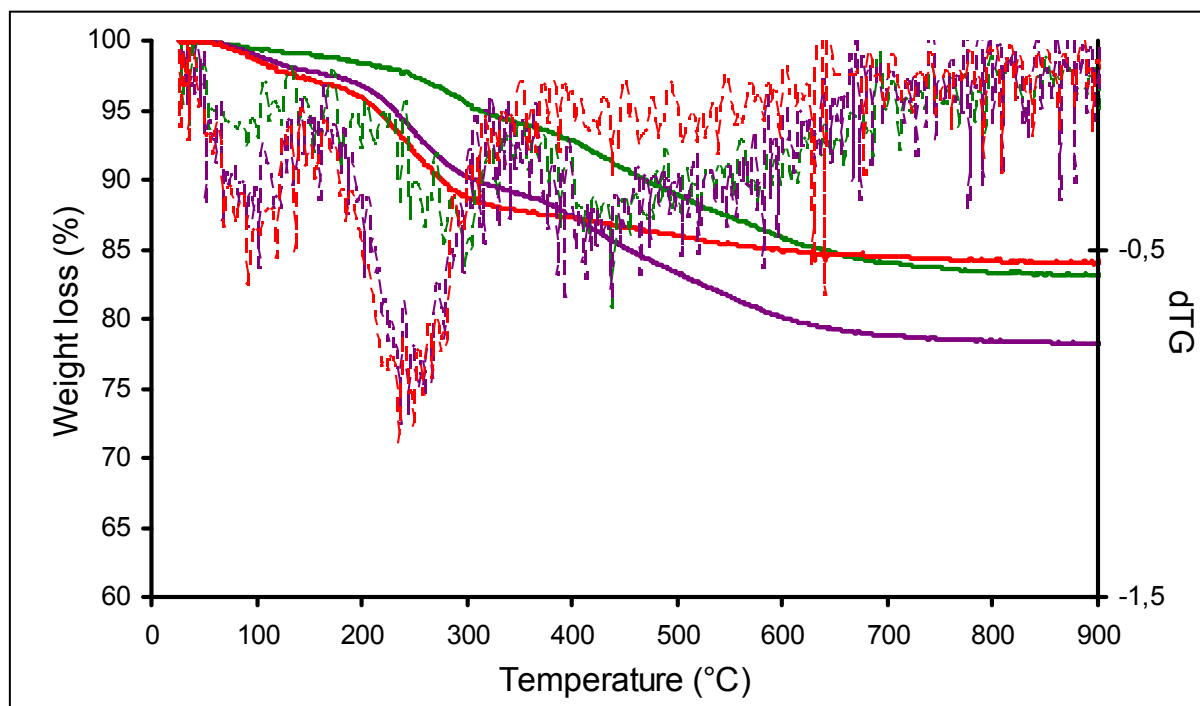

**Figure S1.** TGA profiles of materials LUS-TMA-E15 (red), Py@LUS-TMA-E15 (purple) and N<sub>3</sub>-Py@LUS-E15 (green) as well as their derivative curves (dotted lines). In the case of N<sub>3</sub>-Py@LUS-E15, mass losses corresponding to the degradation of pyridine and azide functions were 9.5 and 4 % respectively.

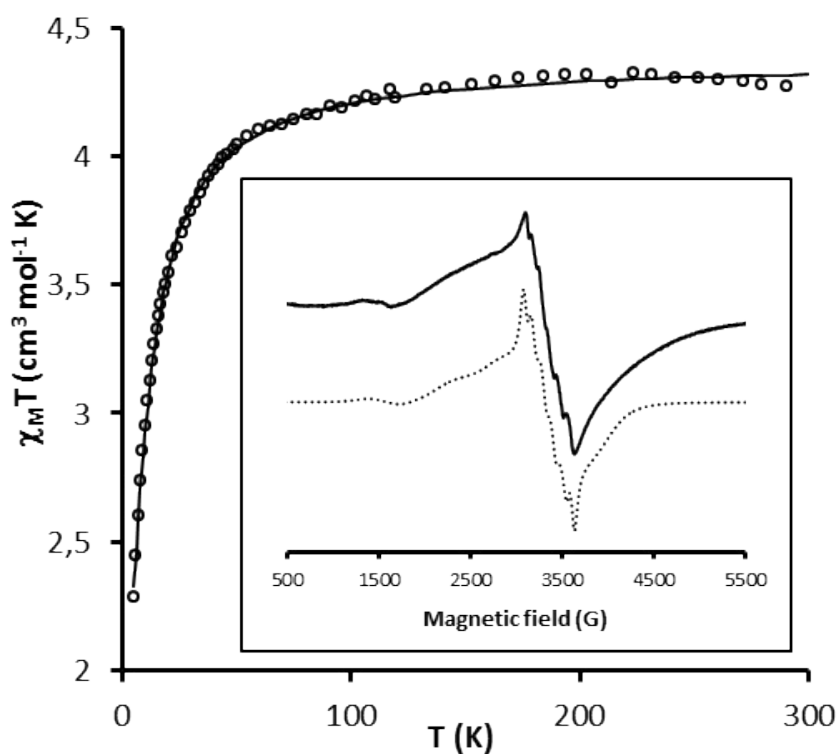

**Figure S2.** Temperature dependence of  $\chi_M T$  for **S2**. The solid line represents the best fit discussed in the text. Insert: solid-state EPR spectra of **S1** at 120 K and its simulation (dotted line).

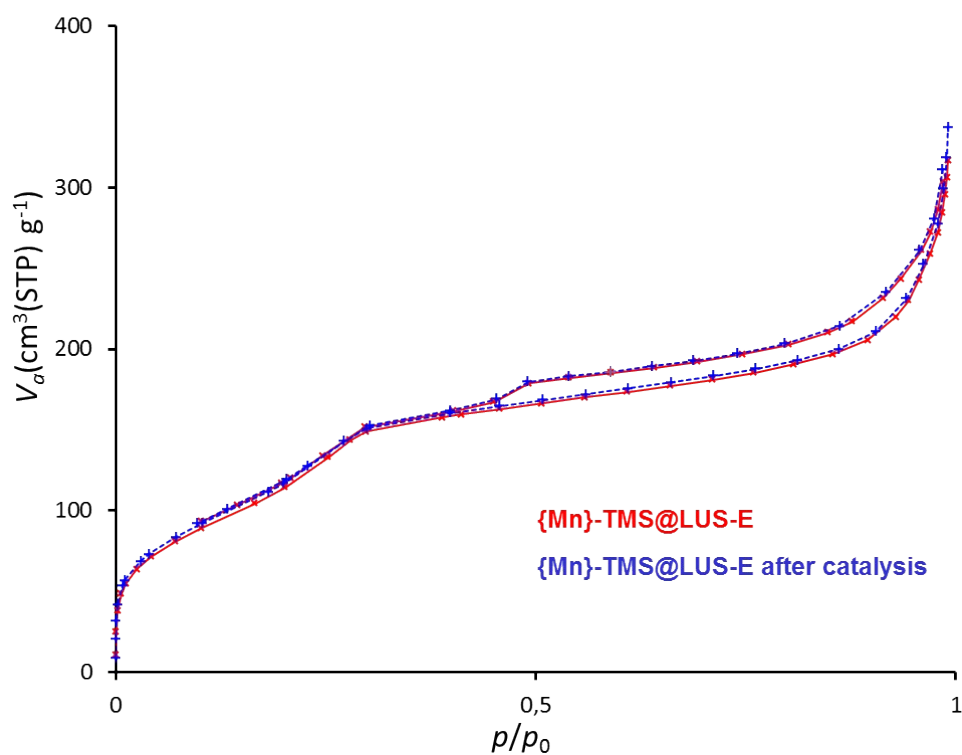

**Figure S3.** Nitrogen sorption isotherms at 77 K of {Mn}-TMS@LUS-E and {Mn}-TMS@LUS-E after catalysis.
